# Supplementary material
Source: ML conference proceedings conference paper supplement (https://openaccess.thecvf.com/content/CVPR2021/html/Chandran_Adaptive_Convolutions_for_CVPR_2021_paper.html)
Supplement: Supplementary file 2 [file Chandran_Adaptive_Convolutions_for_CVPR_2021_supplemental.zip]

Archive with 4 entries (4 files):
- 08297-supp.pdf
- __MACOSX/._08297-supp.pdf
- 08297.mp4
- __MACOSX/._08297.mp4
